# Supplementary material
Source: PubMed Central journal article supplement (PMC2768475)
Supplement: NIHMS152728-supplement-supplement_1.pdf [file NIHMS152728-supplement-supplement_1.pdf]

**Figure S1**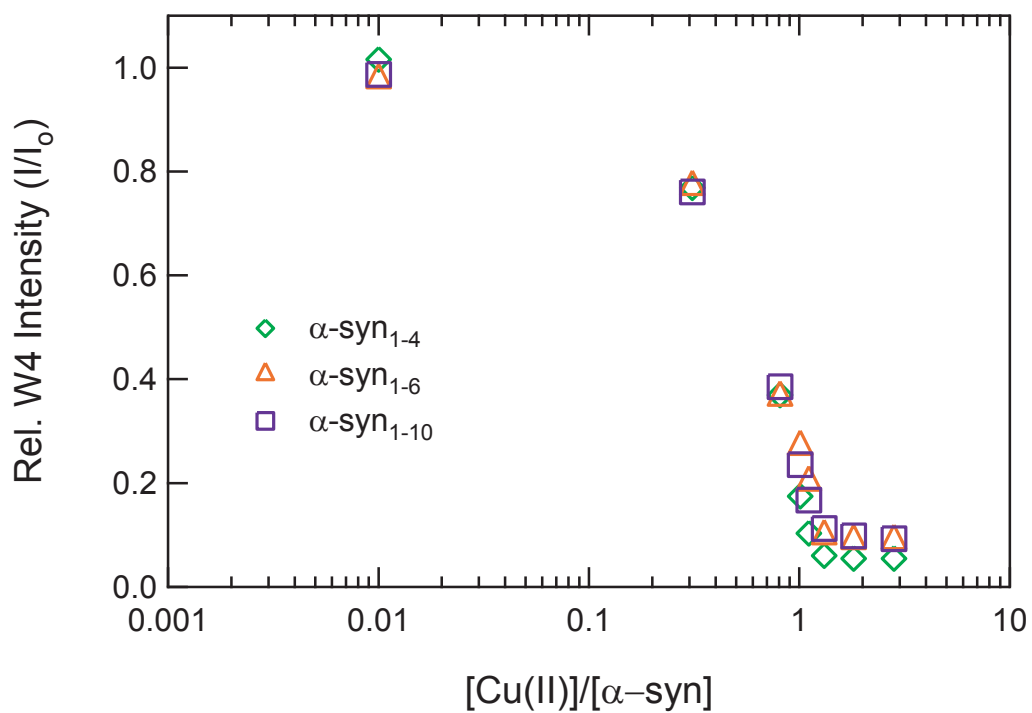

**Figure S1.** Intensity of  $\alpha$ -syn peptide fluorescence as a function of added Cu(II). [peptide]=10  $\mu$ M in deoxygenated 20 mM MOPS, 100 mM NaCl, pH 7 buffer.

Figure S2

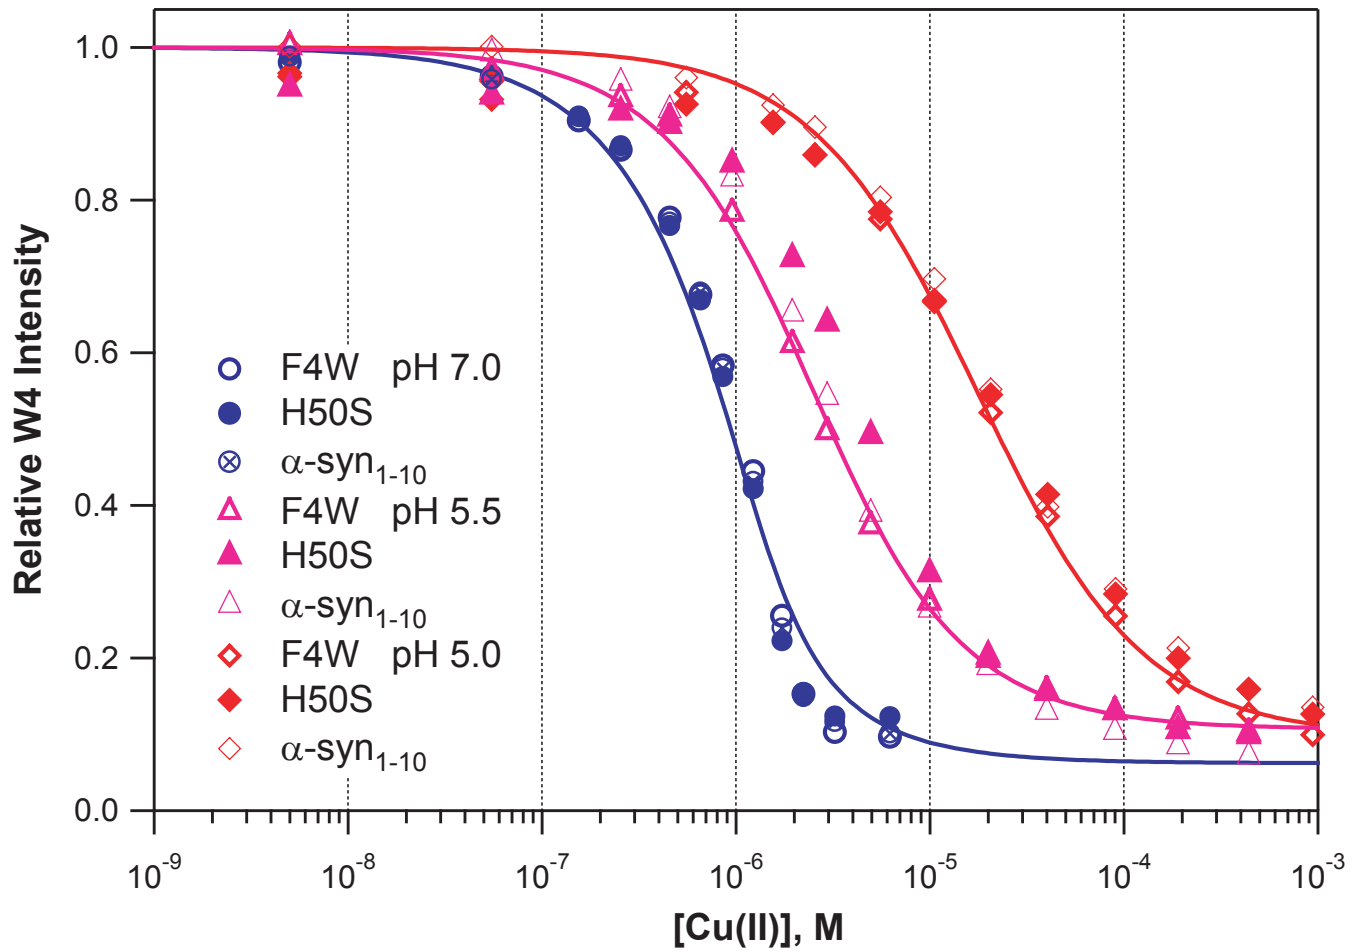

**Figure S2.** Comparison of Cu(II)-binding induced tryptophan fluorescence quenching of F4W, F4W/H50S, and synthetic peptide,  $\alpha$ -syn<sub>1-10</sub> at different pH. For clarity, only fits (solid lines) for F4W protein are shown.

**Figure S3**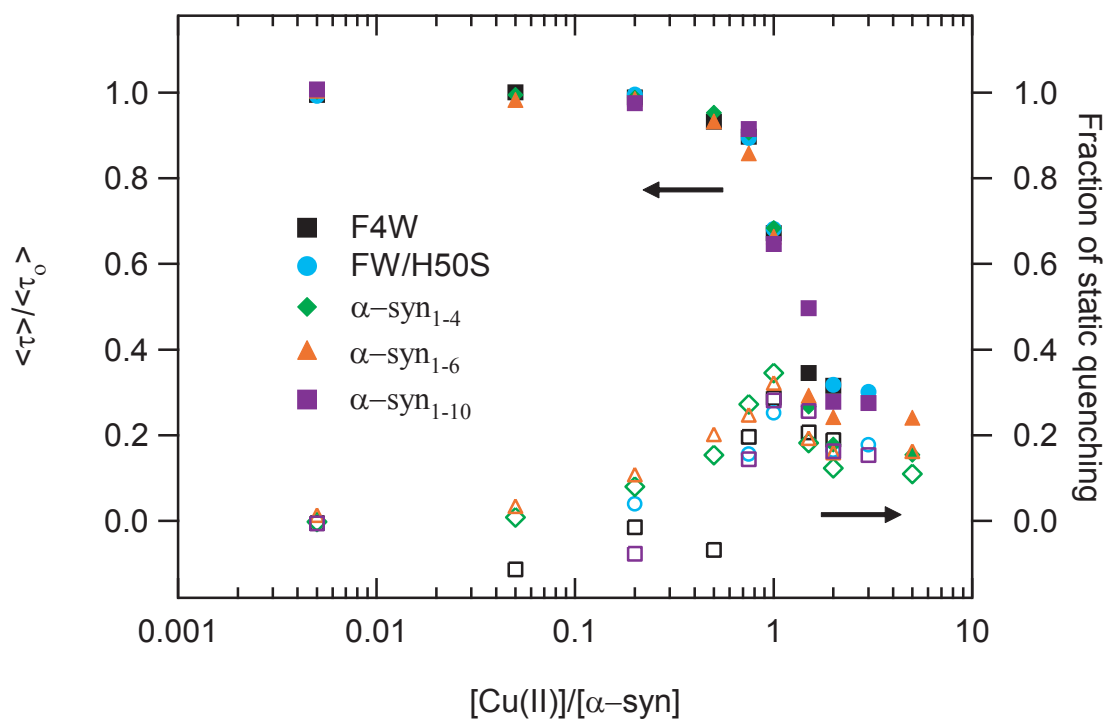

**Figure S3.** Average W4 fluorescence lifetimes and fraction of static quenching of full length and truncated  $\alpha$ -syn as functions of added Cu(II) ([protein/peptide] = 1  $\mu$ M in 20 mM MOPS, 100 mM NaCl, pH 7 buffer).
